# Supplementary material for: Adsorption of Cu(ii), Zn(ii), and Pb(ii) from aqueous single and binary metal solutions by regenerated cellulose and sodium alginate chemically modified with polyethyleneimine
Source: Royal Society of Chemistry journal article supplement (doi:10.1039/c8ra02055h), 2018-01-01
Supplement: c8ra02055h1.pdf [file c8ra02055h1.pdf]

## Supporting Information

### **Adsorption of Cu(II), Zn(II), and Pb(II) from aqueous single and binary metal solutions by regenerated cellulose and sodium alginate chemically modified with polyethyleneimine**

Wei Zhan, Chuanhui Xu, Guangfu Qian, Guohuan Huang, Xiuzhen Tang,  
Baofeng Lin\*

College of Chemistry and Chemical Engineering, Guangxi University, Nanning  
530004, China

Corresponding Author: Baofeng Lin [lbf@gxu.edu.cn](mailto:lbf@gxu.edu.cn)

#### **Synthesis of adsorbents**

To achieve the proposed goals, the following experimental details were conducted: firstly, cotton linter was dissolved in 7 wt.% NaOH/12 wt.% urea aqueous solution pre-cooled to  $-12^{\circ}\text{C}$  to obtain a 4 wt.% transparent cellulose solution under vigorous mechanical agitation for 3 min at ambient temperatures (below  $25^{\circ}\text{C}$ )<sup>1</sup>; SA was dissolved in the same weight ratio of NaOH/urea aqueous solution without pre-cooled to form a 4 wt.% homogeneous SA solution. Secondly, the cellulose solution and SA solution were mixed together by the weight ratio of 1:1 under agitation to generate a homogeneous dispersion. Subsequently, 30% (w/v) PEI aqueous solution was added into the above mixtures (100 g) with a blend ratio of 1:5 (v/w) under gentle agitation to prepare a mixed solution as the water-phase; paraffin oil (250 mL) containing 5% (v/v) span 80 was used as oil-phase. And then, the prepared water-phase and oil-phase were transferred into a three-necked round-bottomed flask (500 mL) successively. To

obtain the adsorbent particles with suitable size, the two-phase mixture was stirred under a vigorous speed of 1000 rpm at the room temperature. After 30 min, 6 mL of GA (25 wt.% aqueous solution) was dropwise-added to this reaction system within 10 min, and the system was further vigorously stirred for 6 h at 60°C. Finally, the resultant adsorbent particles were rinsed thoroughly with acetone and double deionized water and freeze-dried (−52°C, 20 Pa) for 48 h in a freeze drier. The drying samples were marked as PEI-RCSA and stored in a desiccator for sample characterization and further adsorption experiments. Fabrication of the samples RC was the same process as PEI-RCSA, except adding SA solution and PEI aqueous solution into water-phase.

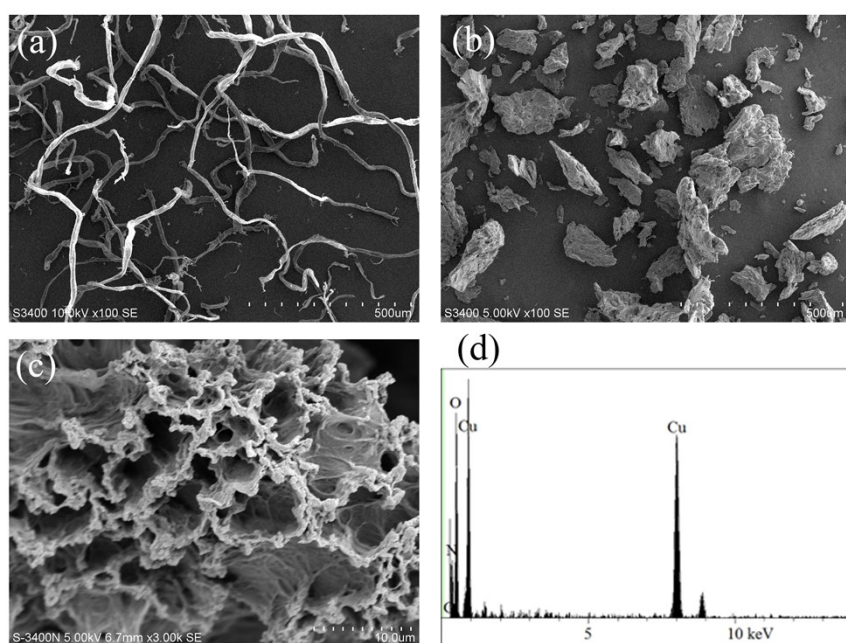

**Fig. S1** (a) SEM image of native cellulose, (b) SEM image of SA, (c) SEM image of PEI-RCSA after the adsorption of Cu(II), (d) EDS pattern of PEI-RCSA after Cu(II) adsorbed.

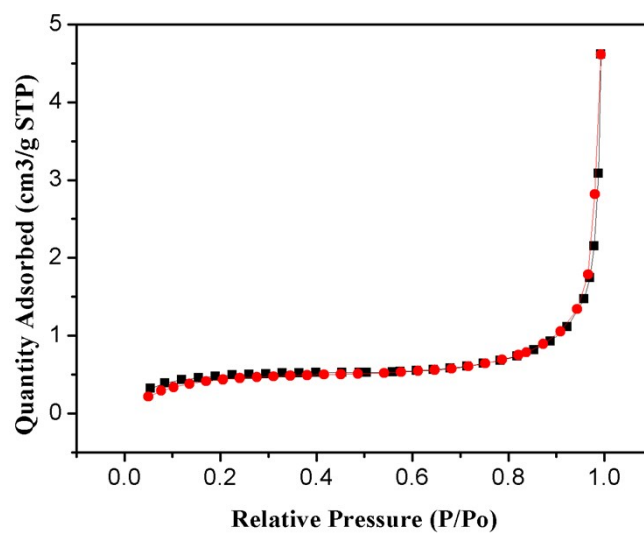

**Fig. S2** Nitrogen adsorption–desorption isotherm of the PEI-RCSA.

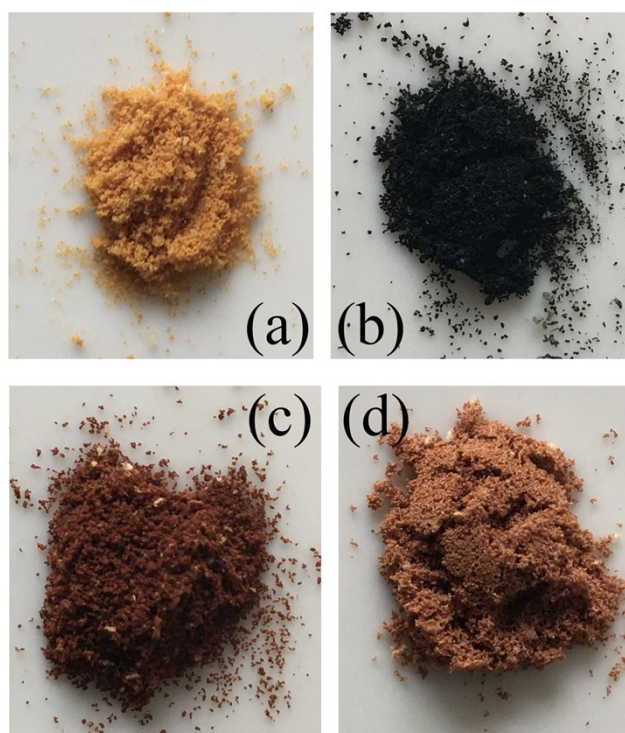

**Fig. S3** (a), (b), (c), and (d) were digitized photographs of the PEI-RCSA before adsorption and the PEI-RCSA loaded with Cu(II), Zn(II) and Pb(II), respectively.

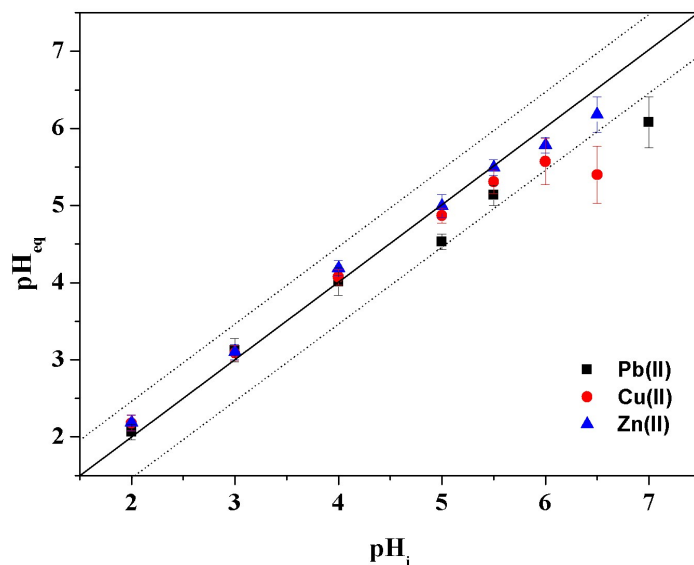

**Fig. S4** pH variation during the adsorption of Cu(II), Zn(II) and Pb(II) in their respective single-component aqueous solutions.

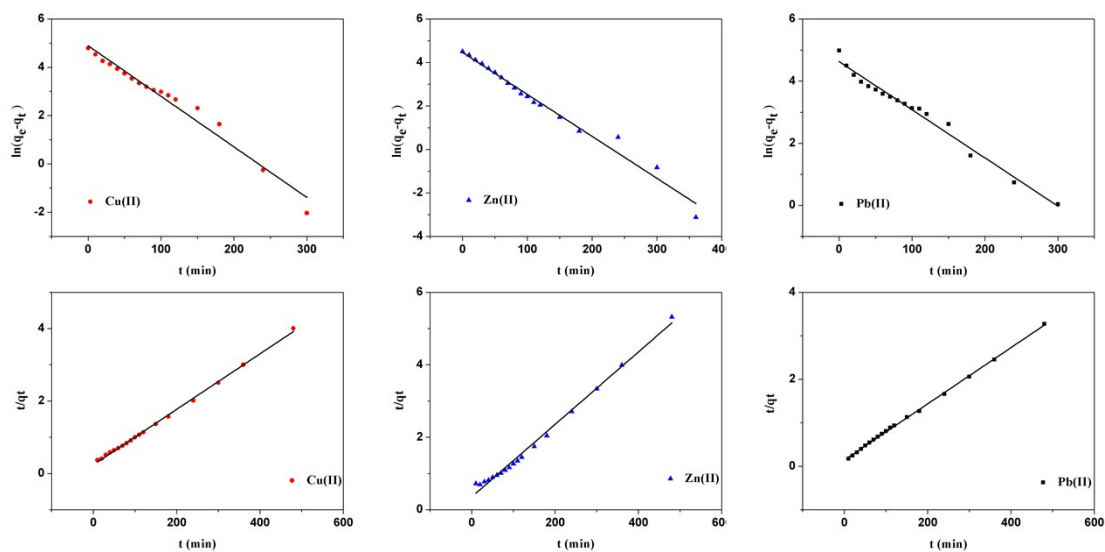

**Fig. S5** Pseudo-first-order kinetic model and pseudo-second-order kinetic model for the adsorption of Cu(II), Zn(II) and Pb(II) in their respective single-component aqueous solutions. (Conditions:  $25 \pm 1^\circ\text{C}$ ; pH 5.5; adsorbent dosage:  $1\text{ g L}^{-1}$ ; shaking speed: 130 rpm;  $C_0$ :  $200\text{ mg Cu L}^{-1}$ ,  $200\text{ mg Zn L}^{-1}$  and  $200\text{ mg Pb L}^{-1}$ ).

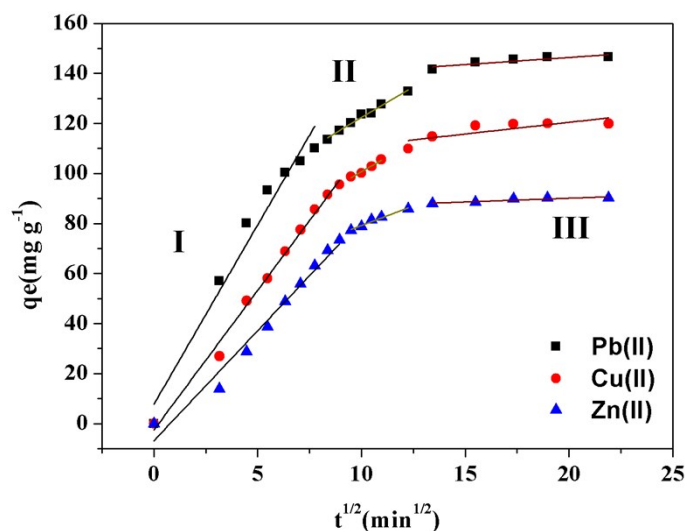

**Fig. S6** Intraparticle diffusion model for adsorption of Cu(II), Zn(II) and Pb(II) in their respective single-component aqueous solutions. (Conditions:  $25 \pm 1^\circ\text{C}$ ; pH 5.5; adsorbent dosage:  $1\text{ g L}^{-1}$ ; shaking speed: 130 rpm;  $C_0$ :  $200\text{ mg Cu L}^{-1}$ ,  $200\text{ mg Zn L}^{-1}$  and  $200\text{ mg Pb L}^{-1}$ ).

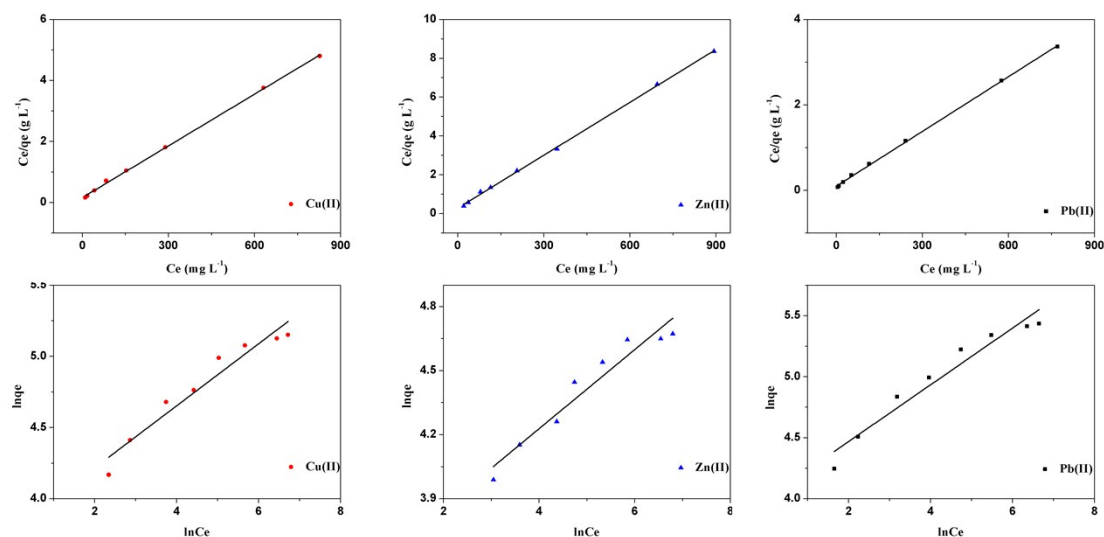

**Fig. S7** Langmuir model and Freundlich model for the adsorption of Cu(II), Zn(II) and Pb(II) in their respective single-component aqueous solutions. (Conditions:  $25 \pm 1^\circ\text{C}$ ; pH 5.5; adsorbent dosage:  $1\text{ g L}^{-1}$ ; contact time: 8 h; shaking speed: 130 rpm).

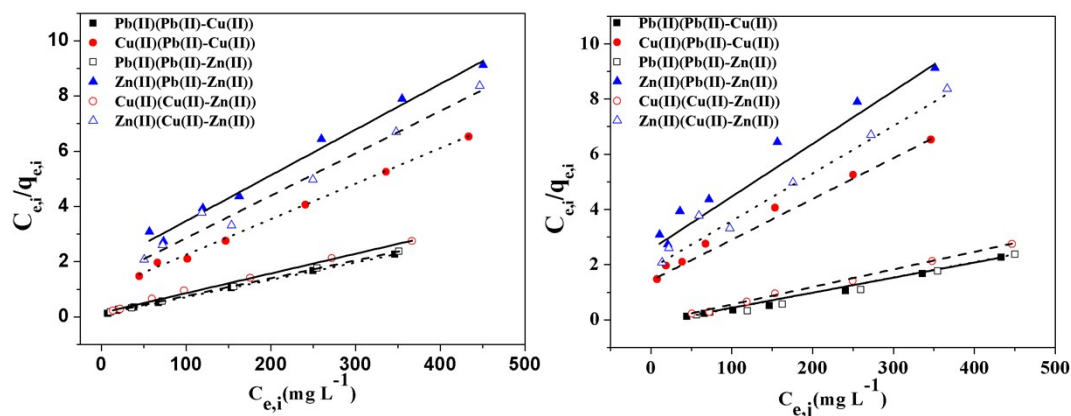

**Fig. S8** Adsorption behavior of the prepared adsorbent PEI-RCSA in the Pb(II)-Cu(II), Pb(II)-Zn(II) and Cu(II)-Zn(II) binary aqueous system ( $i, j$  is Pb(II), Cu(II), Zn(II),  $i \neq j$ ).

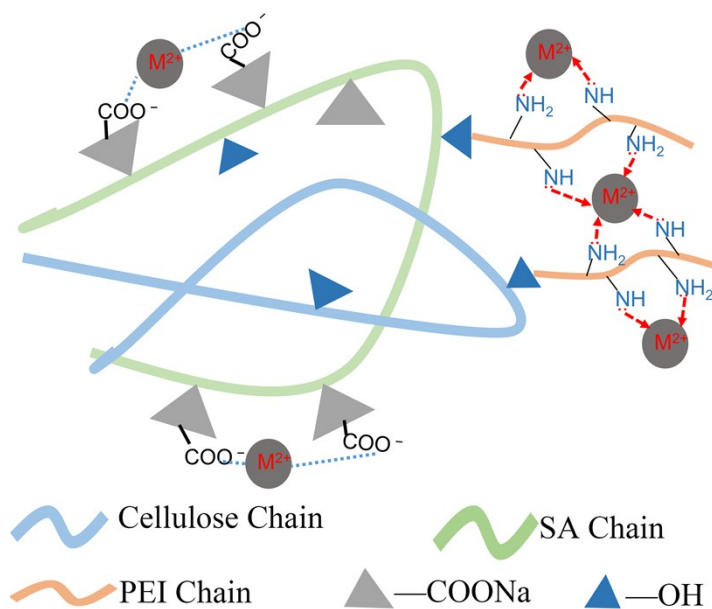

**Fig. S9** Possible adsorption mechanism between heavy metal ions, nitrogen atoms in the PEI polymer chains and carboxyl groups on SA ( $M^{2+}$  represents divalent metal ion).

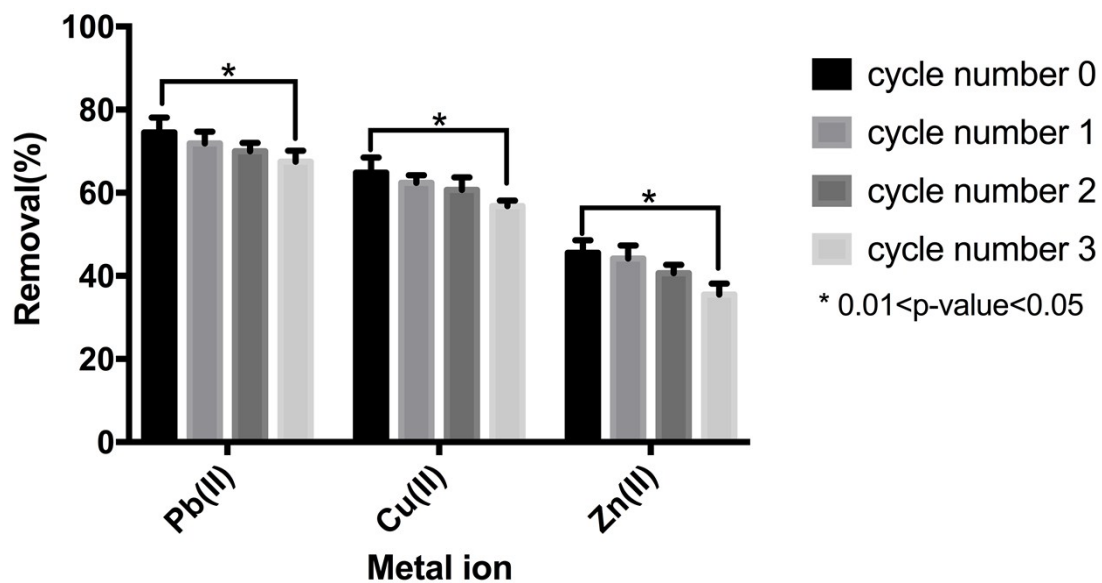

**Fig. S10** Adsorption efficiency of the prepared adsorbent PEI-RCSA for removal of Cu(II), Zn(II) and Pb(II) in their respective single-component aqueous solutions at different regeneration recycles. Significant differences between cycle 0 and cycle 3 were indicated by stars; \*:  $0.01 < p\text{-value} < 0.05$ ,  $n = 3$ .

## References

- 1 J. Cai and L. Zhang, *Biomacromolecules*, 2006, **7**, 183–189.
